# Supplementary material
Source: PubMed Central journal article supplement (PMC5210762)
Supplement: supp_pp.16.01639_PP2016-01639R1_Supplemental_Material_Table.pdf [file supp_pp.16.01639_PP2016-01639R1_Supplemental_Material_Table.pdf]

**Supplemental Table S1. Primers used for the plasmid constructs of Y2H, BiFC, and pull-down.**

| Primer name              | Sequence (5' to 3')                     | note          | Construct  |
|--------------------------|-----------------------------------------|---------------|------------|
| <b>For Y2H</b>           |                                         |               |            |
| OsTrxh1-Y2H_F            | cggaattcATGGCCGCCGAGGAGGGAG             | EcoRI         |            |
| OsTrxh1-Y2H_R            | cgggatccTTAGGCAGAAGCAGATGCAG            | BamHI         |            |
| OsTrxh4_Y2H_F            | cggaattcATGGGCTCCTTCTTCTCGAC            | EcoRI         |            |
| OsTrxh4_Y2H_R            | cgggatccTTAGGATGAGGAGGATGAAATG          | BamHI         |            |
| OsTrxh2_Y2H_F            | cggaattcCTAGAGATGGCGGCGGCCTCAG          | EcoRI         |            |
| OsTrxh2_Y2H_R            | cgggatccCTACATGGCCATATGTAGCTC           | BamHI         |            |
| OsTrxh3_Y2H_F            | cggaattcATGGCGACGGCTGGGGCCAG            | EcoRI         |            |
| OsTrxh3_Y2H_R            | cgggatccGCTCACAGTTTATGATGATCC           | BamHI         |            |
| OsTrxh5_Y2H_F            | catatggaattcATGGGCGGCGCCTTCTCGACGTC     | EcoRI         |            |
| OsTrxh5_Y2H_R            | cgggatccTCACGTCGTCGTCGCCGTCGACGAC       | BamHI         |            |
| OsTrxh6_Y2H_F            | atggcctaggaggccgctcATGGCGCCGCGGTCAGTGCA | Seamless      |            |
| OsTrxh6_Y2H_R            | ccgctgcaggtcgacgTCAACGGAGGAAGTAAGGAGAAG | cloning       |            |
| OsTrxh7_Y2H_F            | cggaattcATGGGGTCTGTGTGGGAA              | EcoRI         |            |
| OsTrxh7_Y2H_R            | cgggatccTCAGGCGCTGTCAGCAAGC             | BamHI         |            |
| OsTrxh8_Y2H_F            | cggaattcATGGGAGGTTGTGTGGGCAAG           | EcoRI         |            |
| OsTrxh8_Y2H_R            | cgggatccTCAGCTGCCATCAGCAAGTG            | BamHI         |            |
| OsTrxh9_Y2H_F            | cggaattcATGGGTTGCTGTGGCAGCA             | EcoRI         |            |
| OsTrxh9_Y2H_R            | cgggatccTATACATCATATATAACTTTGGC         | BamHI         | pGBKT7     |
| OsTrxh10_Y2H_F           | cggaattcATGGAGATCCAGCAGCAGA             | EcoRI         |            |
| OsTrxh10_Y2H_R           | cgggatccTATTCCACCACTATATCAGG            | BamHI         |            |
| AtTrxh1_Y2H_F            | catatggaattcATGGCTTCGGAAGAAGGAC         | EcoRI         |            |
| AtTrxh1_Y2H_R            | ctcagggatccTTAAGCCAAGTGTTTGGC           | BamHI         |            |
| AtTrxh2_Y2H_F            | catatggaattcATGGGAGGAGCTTTATCAAC        | EcoRI         |            |
| AtTrxh2_Y2H_R            | ctcagggatccTTATGCTCTGAGTTTGCTAAC        | BamHI         |            |
| AtTrxh3_Y2H_F            | catatggaattcATGGCCGCGAGAAGGAGAAG        | EcoRI         |            |
| AtTrxh3_Y2H_R            | cgggatccTCAAGCAGCAGCAACAACCTG           | BamHI         |            |
| AtTrxh4_Y2H_F            | catatggaattcATGGCGGCAGAAGAGGGTC         | EcoRI         |            |
| AtTrxh4_Y2H_R            | ctcagggatccTTACGCAGTTGTAACACCAG         | BamHI         |            |
| AtTrxh5_Y2H_F            | catatgccatggATGGCCGGTGAAGGAGAAG         | NcoI          |            |
| AtTrxh5_Y2H_R            | ctcagggatccTCAAGCAGAAGCTACAAGACC        | BamHI         |            |
| AtTrxh7_Y2H_F            | catatggaattcATGGGTTCCAATGTTTCATC        | EcoRI         |            |
| AtTrxh7_Y2H_R            | ctcagggatccTTAAACCCTATGTTGTTCAATC       | BamHI         |            |
| AtTrxh8_Y2H_F            | catatggaattcATGGGTGCTAACGTTTCTAC        | EcoRI         |            |
| AtTrxh8_Y2H_R            | ctcagggatccTCAGAAGAAGGATTGTGTGT         | BamHI         |            |
| AtPHO2_Y2H_F             | ccatgggaattcATGGAAATGTCCCTTACTGAC       | EcoRI         |            |
| AtPHO2_Y2H_R             | gtcgacggatccTTATGATTCTGGTCCAATCTC       | BamHI         |            |
| AtPHO2N_Y2H_F            | same as AtPHO2_Y2H_F                    |               |            |
| AtPHO2N_Y2H_R            | ccgaattcCATATCCACTTCACCTGAATTTG         | EcoRI         |            |
| AtPHO2C_Y2H_F            | ccgaattcTGGGTGAAGAAAGTCCAGC             | EcoRI         |            |
| AtPHO2C_Y2H_R            | same as AtPHO2_Y2H_R                    |               |            |
| OsUBC23_Y2H_F            | tccccgggATGGAAAATCTACCAAATGGC           | SmaI          |            |
| OsUBC23_Y2H_R            | cgagctcTCAGTGTTCTTGAGCAGTTTCC           | SacI          | pGADT7-Rec |
| OsPHO2_Y2H_F             | gccatggaggccagtgtcATGGATCTATATGCAATTG   | Seamless      |            |
| OsPHO2_Y2H_R             | cagctcgagctcgatgTCACGGGCTGCAGGGGATG     | cloning       |            |
| OsPHO2N_Y2H_F            | ccgaattcATGGATCTATATGCAATTGACTC         | EcoRI         |            |
| OsPHO2N_Y2H_R            | ccgaattctcaACCTCTTTTGGACATTTTCGTG       | EcoRI         |            |
| OsPHO2C_Y2H_F            | ccgaattcATGGAGCTGATAACACAGTTTGAG        | EcoRI         |            |
| OsPHO2C_Y2H_R            | ctcagggatccTCACGGGCTGCAGGGGATG          | BamHI         |            |
| <b>For site-mutation</b> |                                         |               |            |
| OsTrxh1_C40S_F           | CTTCACTGCTTCTGGTCTGGCCCTTGCCGCTT        |               |            |
| OsTrxh1_C40S_R           | AAGCGGCAAGGGCCAGACCAGGAAGCAGTGAAG       |               |            |
| OsTrxh1_C43S_F           | CCTGGTGTGGCCCTTCCCCTTCATCGCCCCA         |               |            |
| OsTrxh1_C43S_R           | TGGGGCGATGAAGCGGGAAGGGCCACACCAGG        | site-mutation |            |
| OsTrxh4_C56S_F           | TCTCCGCCACCTGGTCCGGGCCCTGCCGCTT         |               |            |
| OsTrxh4_C56S_R           | AAGCGGCAGGGCCCGACCAGGTGGCGGAGA          |               |            |

|                |                                  |               |
|----------------|----------------------------------|---------------|
| OsTrxh4_C59S_F | CTGGTGC GGGCCCTCCGCTTCATCGAGCC   |               |
| OsTrxh4_C59S_R | GGCTCGATGAAGCGGGAGGGCCCCGACCAGG  |               |
| OsPHO2_C26A_F  | GAAGAA GCTGAACTTACATACTGTGGTC    |               |
| OsPHO2_C26A_R  | GTAAGTTCA GCTTCTTCTTGGTCTTCTTCAC |               |
| OsPHO2_C31S_F  | TACATACTCTGGTCATGCCCAGAACATC     |               |
| OsPHO2_C31S_R  | CATGACCA GAGTATGTAAGTTACATTTC    |               |
| OsPHO2_C65A_F  | ACATAGTTGCCCTCTGCAGCTGACCCATC    |               |
| OsPHO2_C65A_R  | CTGCAGAGGCAACTATGTCTCCATGCAG     |               |
| OsPHO2_C113S_F | CTGGTGATTCTGTGGTGTATGGGGCCATG    |               |
| OsPHO2_C113S_R | TCACCACAG AATCACCAGAGACAAAGGA    |               |
| OsPHO2_C140S_F | GGCAAGGCTGAAATGCTCTTAAGAGA       |               |
| OsPHO2_C140S_R | GCATTTCA GACCTTGCCCCATCACTGA     |               |
| OsPHO2_C186S_F | ATGGTTGTCTGGATCATGGAAAGCTAG      |               |
| OsPHO2_C186S_R | ATGATCCA GACAACCATGTACCCGACT     |               |
| OsPHO2_C239S_F | TGCTTTCAAGCTTCCCTTATGCCAATTG     |               |
| OsPHO2_C239S_R | AGGGAAGCTTGAAAGCAAAGTGAGCTTC     | site-mutation |
| OsPHO2_C251S_F | GTGACTGGAGCACTCTTTCGGATTGCG      |               |
| OsPHO2_C251S_R | AAGAGTGCTCCAGTCAACCAACTGCCA      |               |
| OsPHO2_C256S_F | TTCGGATTCCGAGGG AAGTCTCTGGG      |               |
| OsPHO2_C256S_R | TTCCCTCGAATCCGAAAGAGTGCACC       |               |
| OsPHO2_C268A_F | ACAAATCTGCCCTTCATGAGTATGACCTGG   |               |
| OsPHO2_C268A_R | TCATGAAGGCAGATTTGTCAGAATTTTCC    |               |
| OsPHO2_C351S_F | ATGGTAGATCCAGCGGACTGGGATAGT      |               |
| OsPHO2_C351S_R | TCCGCTGGGATCTACCATTATCCTCAAC     |               |
| OsPHO2_C445S_F | TCTTATCATCTATTGGCAATGTTCTTGG     |               |
| OsPHO2_C445S_R | TGCCAATA GATGATAAGAAGGCAGAGG     |               |
| OsPHO2_C522A_F | TGGAGACGCTACAGGATCCTTGCGCAAAG    |               |
| OsPHO2_C522A_R | ATCCTGTAGCGTCTCCAGCAGATTCTTCC    |               |
| OsPHO2_C616A_F | TGACCGACGCTTCTGATCACCCTTTGTC     |               |
| OsPHO2_C616A_R | ATCAGAA GCGTCCGGTCAACATCAAATC    |               |
| OsPHO2-C719A_F | GCAAAGTGCCCTTAGCCTGCTCAAACA      |               |
| OsPHO2-C719A_R | GGCTAAGGCCACTTTGCCAGACTCATAAC    |               |

**For FP subcellular localization and BiFC**

|                               |                                                                     |                  |                                           |
|-------------------------------|---------------------------------------------------------------------|------------------|-------------------------------------------|
| AtCNX1-YFP_F                  | catgccatggcaAGACAACGGCAACTATTTTCC                                   | NcoI             | pSAT6-EYFP-N1                             |
| AtCNX1-YFP_R                  | egggatccCAGAATTATCACGTCTCGGTTGCC                                    | BamHI            |                                           |
| AtCNX1-nYFP_F                 | same as AtCNX1-YFP_F                                                |                  |                                           |
| AtCNX1-nYFP_R                 | catgccatggatccATTATCACGTCTCGGTTGCC                                  | NcoI             | pSAT1-nEYFP-C1                            |
| OsBiP3-YFP_F                  | catttacgaacgatagccATGGATCGGGTTCGCGGATG                              |                  | pSAT6-EYFP-N1                             |
| OsBiP3-YFP_R                  | cccttctcaccatcagggatccCAGCTCGTCATGCTCGTCTCGT                        |                  |                                           |
| OsBiP3-cYFP_F                 | same as OsBiP3-YFP_F                                                |                  |                                           |
| OsBiP3-cYFP_R                 | agctgcacgctgccgccgatccCAGCTCGTCATGCTCGTCTCGT                        | Seamless cloning | pSAT1-nEYFP-C1                            |
| YFP-OsPHO2_F                  | ctcagatctcagctcaCATGGATCTATATGCAATTGAC                              |                  | pSAT6-EYFP-C1                             |
| YFP-OsPHO2_R                  | tccccggcccgggtacTCACGGGCTGCAGGGGATGC                                |                  |                                           |
| OsTrxh1_GW_F                  | GGGGACAAGTTTGTACAAAAAAGCAGGCTTCATGGCCGCCGAGGAGGG                    |                  |                                           |
| OsTrxh1_GW_R                  | GGGGACCACTTTGTACAAGAAAGCTGGGTCTCCACCTCCGGATCMGGCAGAAGCAGATGCAGCAG   |                  | pDEST-CGFP for OsTrxh1/4-GFP;             |
| OsTrxh4_GW_F                  | GGGGACAAGTTTGTACAAAAAAGCAGGCTTCATGGGCTCCTTCTTCTCGAC                 |                  | pSAT5(A)-DEST-cEYFP-N1 for OsTrxh1/4-cYFP |
| OsTrxh4_GW_R                  | GGGGACCACTTTGTACAAGAAAGCTGGGTCTCCACCTCCGGATCMGGATGAGGAGGATGAAATGAAC | Gateway cloning  |                                           |
| OsPHO2_GW_F                   | GGGGACAAGTTTGTACAAAAAAGCAGGCTTCATGGATCTATATGCAATTGACTCG             |                  |                                           |
| OsPHO2_GW_R                   | GGGGACCACTTTGTACAAGAAAGCTGGGTCTCCACCTCCGGATCMGGGCTGCAGGGGATGC       |                  | pSAT4-DEST-nEYFP-C1                       |
| nYFP-OsPHO2N_R (OsPHO2N_GW_R) | GGGGACCACTTTGTACAAGAAAGCTGGGTCTCCACCTCCGGATCMACCTCTTTTGACATTTTCGTG  |                  |                                           |
| nYFP-OsPHO2_F                 | ctcagatctcagctcaCATGGATCTATATGCAATTGAC                              | Seamless cloning | C719A; pSAT1-nEYFP-C1                     |
| nYFP-OsPHO2_R                 | tccccggcccgggtacTCACGGGCTGCAGGGGATGC                                |                  |                                           |

|                                               |                                            |                |                   |
|-----------------------------------------------|--------------------------------------------|----------------|-------------------|
| OsPHO1-cYFP_F                                 | acgaacgatagagatcATGGTGAAGTTCTCGAGGGAG      |                |                   |
| OsPHO1-cYFP_R                                 | gtaccgtcgactgcagCAATCAGTTTCAAGTTCACGGA     |                |                   |
| OsPHF1-cYFP_F                                 | acgaacgatagagatcATGGCAGGCGGCGGAGGTG        |                |                   |
| OsPHF1-cYFP_R                                 | gtaccgtcgactgcagCCAGGGGTTCTGGTCCTCAG       |                |                   |
| OsIRT1-cYFP_F                                 | acgaacgatagagatcCGAACGAAAATGGCGACGCC       | Seamless       | pSAT1A-cEYFP-N1   |
| OsIRT1-cYFP_R                                 | gtaccgtcgactgcagCACGCCACTTGGCCATGAC        | cloning        |                   |
| OsPT2-cYFP_F                                  | acgaacgatagagatcATGGCGGGATCGCAGCTC         |                |                   |
| OsPT2-cYFP_R                                  | gtaccgtcgactgcagCACGCTTGGGCGATCGCTTC       |                |                   |
| OsPT6-cYFP_F                                  | acgaacgatagagatcGAAGCTGGCATGGGCGGC         |                |                   |
| OsPT6-cYFP_R                                  | gtaccgtcgactgcagCACAGTACAGTTTGCAGGGG       |                |                   |
| OsPT8-cYFP_F                                  | ccgctcgagATGGCGCGGCAGGAGCAG                | XhoI           |                   |
| OsPT8-cYFP_R                                  | cggaattccGCCGTCTGCGGCCGCAC                 | EcoRI          |                   |
| OsPHO1-mCherry_F                              | OsPHO1-cYFP_F                              |                |                   |
| OsPHO1-mCherry_R                              | OsPHO1-cYFP_R                              | Seamless       | pSAT4A-mCherry-N1 |
| OsPHF1-mCherry_F                              | OsPHF1-cYFP_F                              | cloning        |                   |
| OsPHF1-mCherry_R                              | OsPHF1-cYFP_R                              |                |                   |
| <b>For Prokaryotic expression (pull-down)</b> |                                            |                |                   |
| 6His-OsTrxh1_F                                | GCTGATATCGGATCCGagttcATGGCCGCCGAGGAGGGA    | Seamless       | pET30a            |
| 6His-OsTrxh1_R                                | GTGGTGGTGGTGGTGGTCTTAGGCAGAAGCAGATGCAG     |                |                   |
| 6His-OsTrxh4_F                                | GCTGATATCGGATCCGagttcATGGGCTCCTTCTTCTCG    |                |                   |
| 6His-OsTrxh4_R                                | GTGGTGGTGGTGGTGGTCTTAGGATGAGGAGGATGAAAT    |                |                   |
| GST-OsPHO2_F                                  | OsPHO2_GW_F                                |                |                   |
| GST-OsPHO2_R                                  | OsPHO2_GW_R                                |                |                   |
| GST-AtPHO2_F                                  | GGGGACAAGTTTGTACAAAAAAGCAGGCTTCATGGAA      | Gateway        | pDEST15           |
| (AtPHO2_GW_F)                                 | ATGTCCCTTACTGAC                            | cloning        |                   |
| GST-AtPHO2_R                                  | GGGGACCACTTTGTACAAGAAAGCTGGGTCTCCACCTC     |                |                   |
| (AtPHO2_GW_R)                                 | CGGATCMTGATTCTGGTCCAATCTCTTG               |                |                   |
| <b>For split-ubiquitin Y2H</b>                |                                            |                |                   |
| OsPHO2-Cub_F                                  | tatgtaatggccattATGGATCTATATGCAATTGAC       | Seamless       | pBT3-STE          |
| OsPHO2-Cub_R                                  | ctgcagatggccgaggACGGGCTGCAGGGGATGCC        |                |                   |
| OsPHO1-Cub_F                                  | tatgtaatggccattATGGTGAAGTTCTCGAGGG         |                |                   |
| OsPHO1-Cub_R                                  | ctgcagatggccgaggAATCAGTTTCAAGTTCACGG       |                |                   |
| OsPHF1-Cub_F                                  | tatgtaatggccattATGGCAGGCGGCGGAGGTG         |                |                   |
| OsPHF1-Cub_R                                  | ctgcagatggccgaggACCAGGGGTTCTGGTCCTCA       |                |                   |
| OsPT2-Cub_F                                   | attacaagccattacggccATGGCGGGATCGCAGCTCA     |                |                   |
| OsPT2-Cub_R                                   | aactgattggccgaggcggccccCGCTTGGGCGATCGCTTCT |                |                   |
| OsPT6-Cub_F                                   | attacaagccattacggccCAAGCTGGCATGGGCGGC      | SfiI           |                   |
| OsPT6-Cub_R                                   | aactgattggccgaggcggccccCAGTACAGTTTGCAGGGG  |                |                   |
| OsPT8-Cub_F                                   | attacaagccattacggccATGGCGCGGCAGGAGCAGCAG   |                |                   |
| OsPT8-Cub_R                                   | aactgattggccgaggcggccccCGCCGTCTGCGGCCGCACG |                |                   |
| Cub-OsPHO2_F                                  | tcctgcaggccattATGGATCTATATGCAATTGAC        |                |                   |
| Cub-OsPHO2_R                                  | taccatggggccgaggTCACGGGCTGCAGGGGATG        |                |                   |
| Cub-OsPHO1_F                                  | tcctgcaggccattATGGTGAAGTTCTCGAGGG          |                | pBT3-N            |
| Cub-OsPHO1_R                                  | taccatggggccgaggTCAATCAGTTTCAAGTTCAC       |                |                   |
| Cub-OsPHF1_F                                  | tcctgcaggccattATGGCAGGCGGCGGAGGTG          |                |                   |
| Cub-OsPHF1_R                                  | taccatggggccgaggTCACCAGGGGTTCTGGTCC        |                |                   |
| OsPT2-NubG_F                                  | acgtcagtggccattaTATGGCGGGATCGCAGCTCA       | SfiI, Seamless | pPR3-STE          |
| OsPT2-NubG_R                                  | tctcgagaggccgaggACGCTTGGGCGATCGCTTCT       |                |                   |
| OsPT6-NubG_F                                  | acgtcagtggccattaTCAAGCTGGCATGGGCGGC        |                |                   |
| OsPT6-NubG_R                                  | tctcgagaggccgaggACAGTACAGTTTGCAGGGG        |                |                   |
| OsPT8-NubG_F                                  | acgtcagtggccattaTATGGCGCGGCAGGAGCAGCAG     |                |                   |
| OsPT8-NubG_R                                  | tctcgagaggccgaggACGCCGTCTGCGGCCGCACG       |                |                   |
| OsPHO2-NubG_F                                 | acgtcagtggccattaTATGGATCTATATGCAATTGAC     |                |                   |
| OsPHO2-NubG_R                                 | tctcgagaggccgaggACGGGCTGCAGGGGATGCC        |                |                   |
| NubG-OsPHO2_F                                 | cgcagatggccattATGGATCTATATGCAATTGAC        |                | pPR3-N            |
| NubG-OsPHO2_R                                 | tctcgagaggccgaggTCACGGGCTGCAGGGGATG        |                |                   |

**Supplemental Table S2. Primers used for the plasmid constructs of transient expression in tobacco leaves, *pho2* recovery and *OsTrxh1/h4* transgenic plants.**

| Primer name                                                                                        | Sequence (5' to 3')                                                         | note             | Construct                                         |
|----------------------------------------------------------------------------------------------------|-----------------------------------------------------------------------------|------------------|---------------------------------------------------|
| <b>For the identification of the <i>Tos17</i> insertion line of <i>Ospho2</i> mutant.</b>          |                                                                             |                  |                                                   |
| LB                                                                                                 | ATTGTTAGGTTGCAAGTTAGTTAAGA                                                  |                  |                                                   |
| LP                                                                                                 | TGGCCGTTGTATTTTAGCATC                                                       |                  |                                                   |
| RP                                                                                                 | GGTCCTGAAAGTTTGGAGGAC                                                       |                  |                                                   |
| <b>For 35S::<i>AtPHO2</i> and 35S::<i>OsPHO2</i> overexpression</b>                                |                                                                             |                  |                                                   |
| AtPHO2-OE_F                                                                                        | AtPHO2_GW_F                                                                 |                  |                                                   |
| AtPHO2-OE_R                                                                                        | AtPHO2_GW_R                                                                 | Gateway cloning  | pH2GW7(0)                                         |
| OsPHO2-OE_F                                                                                        | OsPHO2_GW_F                                                                 |                  |                                                   |
| OsPHO2-OE_R                                                                                        | OsPHO2_GW_R                                                                 |                  |                                                   |
| <b>For constructs of 1300-3F and 1300-4M for transient expression in tobacco leaves</b>            |                                                                             |                  |                                                   |
| pBS-3F_F                                                                                           | catggACTACAAAGACCATGACGGTGATTATAAAGATCATGACATCGATTACAAGGATGACGATGACAAGCTTg  | sense oligo      | ligation to pBS-omega-FLAG-NdeI at NcoI and EcoRI |
| pBS-3F_R                                                                                           | aattcAAGCTTGTTCATCGTCATCCTTGTAATCGATGTCATGATCTTTATAATCACCGTCATGGTCTTTGTAGTc | anti-sense oligo |                                                   |
| 1300-3F_F                                                                                          | ggacgagctcggtacCTCGAGGTATTTTTACAAC                                          |                  | pC1300M at KpnI and XbaI                          |
| 1300-3F_R                                                                                          | gctctgcaggtcgactTCTAGAACTAGTGGATCCC                                         | Seamless cloning |                                                   |
| 3F-OsPHO2_F                                                                                        | cgggggatccactagtcaATGGATCTATATGCAATTGAC                                     |                  | 1300-3F at XbaI                                   |
| 3F-OsPHO2_R                                                                                        | ctctgcaggtcgactTCACGGGCTGCAGGGGATG                                          |                  |                                                   |
| pBS-OsTrxh1_F                                                                                      | same as OsTrxh1-Y2H_F                                                       | EcoRI            |                                                   |
| pBS-OsTrxh1_R                                                                                      | same as OsTrxh1-Y2H_R                                                       | BamHI            |                                                   |
| pBS-OsTrxh4_F                                                                                      | same as OsTrxh4_Y2H_F                                                       | EcoRI            |                                                   |
| pBS-OsTrxh4_R                                                                                      | same as OsTrxh4_Y2H_R                                                       | BamHI            | pBS-omega-4MYC-NdeI                               |
| pBS-GFP_F                                                                                          | aactgcagATGGAATTCAGTAAAGGAGA                                                | PstI             |                                                   |
| pBS-GFP_R                                                                                          | cgggatccTAAAGCTCATCATGTTTGTATAG                                             | BamHI            |                                                   |
| pBS-OsPHF1_F                                                                                       | ttacaattacaattacCATGGCAGGCGGCGGAGGTG                                        |                  |                                                   |
| pBS-OsPHF1_R                                                                                       | caccgtaattaacgcCATACTACCCAGGGGTTCTGGTCCTCA                                  | Seamless cloning |                                                   |
| 4M-OsPHF1_F                                                                                        | same as 1300-3F_F                                                           |                  | pC1300M at KpnI and XbaI                          |
| 4M-OsPHF1_R                                                                                        | gctctgcaggtcgactTCACATATGGCTACCGTTCAAG                                      |                  |                                                   |
| <b>For complementation of <i>Ospho2</i> with genomic <i>OsPHO2</i> sequence</b>                    |                                                                             |                  |                                                   |
| 1300-OsPHO2g_F1                                                                                    | tgacgatgacaagcttgGAATGGATCTATATGCAATTGAC                                    |                  | pBS-3F at EcoRI and BamHI                         |
| 1300-OsPHO2g_R1                                                                                    | ccgctctagaactagtTGGGTAGAAGGCTATGGAAG                                        |                  |                                                   |
| 1300-OsPHO2g_F2                                                                                    | ctatgaccatgattacgGGGAGAGAAGGGTTTCAGGT                                       | Seamless cloning |                                                   |
| 1300-OsPHO2g_R2                                                                                    | TAGATCCATgaattcaagctgtcatcgtc                                               |                  | pC1300M at EcoRI and XbaI                         |
| 1300-OsPHO2g_F3                                                                                    | gcttgaattcATGGATCTATATGCAATTGAC                                             |                  |                                                   |
| 1300-OsPHO2g_R3                                                                                    | aagctctgcaggtcgactTGGGTAGAAGGCTATGGAAG                                      |                  |                                                   |
| <b>For Over-expression and RNAi constructs of <i>OsTrxh1</i> and <i>OsTrxh4</i></b>                |                                                                             |                  |                                                   |
| OsTrxh1-OE-F                                                                                       | ACCCCTCTCTTTGATCTCGTC                                                       |                  |                                                   |
| OsTrxh1-OE-R                                                                                       | GAGGACACCCAAGCCAAACT                                                        |                  | pTF101-ubi, BamHI                                 |
| OsTrxh4-OE-F                                                                                       | GAGAGAACCAAACCAAGCACG                                                       |                  |                                                   |
| OsTrxh4-OE-R                                                                                       | GGTACTAAATGAGGAATGCAGGC                                                     |                  |                                                   |
| OsTrxh1-Ri-F                                                                                       | CACCCAGTGTTTCGCTGAATACG                                                     |                  |                                                   |
| OsTrxh1-Ri-R                                                                                       | GACGATAACGATGACTAACGCT                                                      | Gateway cloning  | pH7GWIWG2(I)                                      |
| OsTrxh4-Ri-F                                                                                       | CACCCCATGCCGACCTTTGTGTT                                                     |                  |                                                   |
| OsTrxh4-Ri-R                                                                                       | TCCATTCCCAAGTATCACAAG                                                       |                  |                                                   |
| <b>For CRISPR/Cas9 mutation of <i>OsTrxh1</i> and <i>OsTrxh4</i> and identification of mutants</b> |                                                                             |                  |                                                   |
| h1-giRNA_F                                                                                         | GGCAGGCCAAGGAGGCCGCAAAG                                                     |                  |                                                   |
| h1-giRNA_R                                                                                         | AAACCTTTGCCGGCCTCCTTGCC                                                     |                  | pRGEB31                                           |
| h4-giRNA_F                                                                                         | GGCACTTCTCCGCCACCTGGTGC                                                     |                  |                                                   |
| h4-giRNA_R                                                                                         | AAACGCACCAGGTGGCGGAGAAGT                                                    |                  |                                                   |
| h1-PCR_F                                                                                           | ATCCTATTCAAATCGAAACC                                                        |                  |                                                   |
| h1-PCR_R                                                                                           | AGAAACAATCGATCTCCTCG                                                        |                  |                                                   |
| h4-PCR_F                                                                                           | ACAAGAGCAACCCCAACAAG                                                        |                  |                                                   |
| h4-PCR_R                                                                                           | AGACATGCCAGGGTTCGTAGC                                                       |                  |                                                   |
| Cas9-PCR_F                                                                                         | ATGGACTATAAGGACCACGAC                                                       |                  |                                                   |
| Cas9-PCR_R                                                                                         | CTCGTGCTTCTTATCCTCTTC                                                       |                  |                                                   |

**Supplemental Table S3. Primers used for RT and qRT PCR analysis.**

| Primer name    | Sequence (5' to 3')     | amplicon/bp |
|----------------|-------------------------|-------------|
| OsACTIN1_qRT_F | CAACACCCCTGCTATGTACG    | 92          |
| OsACTIN1_qRT_R | CATCACCAGAGTCCAACACAA   |             |
| OsTrxh1_qRT_F  | GTGCTGAGGCTGACAAGGT     | 197         |
| OsTrxh1_qRT_R  | GACACCCAAGCCAAACTGAC    |             |
| OsTrxh4_qRT_F  | ACGAACTTTCGGAAGTGGC     | 174         |
| OsTrxh4_qRT_R  | GCAGGCATAAGTTTGGGAT     |             |
| OsPHO2_qRT_F   | CAAGCCACCAAAGCATTTC     | 151         |
| OsPHO2_qRT_R   | GTTCTTGCATCCGTCATCC     |             |
| OsACTIN1_RT_F  | TCAGCAACTGGGATGATATGGAG | 385         |
| OsACTIN1_RT_R  | GCCGTTGTGGTGAATGAGTAAC  |             |
| OsPHO2_RT_F    | ATGATCGAGGAGCACACTA     | 337         |
| OsPHO2_RT_R    | ATGTTGGCTTCTCAAACCTG    |             |
| AtEF1b_RT_F    | AGGAGAGGGAGGCTGCTAAG    | 320         |
| AtEF1b_RT_R    | AATCTTGTTGAAAGCGACAATG  |             |
| AtPHO2_RT_F    | ATCAGGGTTCCACTTCGGTT    | 363         |
| AtPHO2_RT_R    | TTTGCCTCCAAATTGCTCC     |             |
